# Supplementary material for: Real-time snapping dynamics and nanoscale thickness profiling of salmon keratocyte tunneling nanotubes using quantitative phase microscopy
Source: Research Square preprint supplement (doi:10.21203/rs.3.rs-8172968/v1), 2025-12-04
Supplement: Supplementary file 1 [file 30983344ecec3f7b438ba6cc.docx]

**Supplementary file**

**Real-time snapping dynamics and nanoscale thickness profiling of salmon keratocyte tunneling nanotubes using quantitative phase microscopy**

Bilal M. Afzal1, Marie K. Mikkelborg1, Dhivya B. Thiyagarajan1, Deanna L. Wolfson2, Balpreet S. Ahluwalia2, and Roy A. Dalmo1,* , Azeem Ahmad2, *

1The Norwegian College of Fishery Science, UiT The Arctic University of Norway, 9037, Tromsø, Norway

2Department of Physics and Technology, UiT The Arctic University of Norway, 9037, Tromsø, Norway

Corresponding author: [*azeem.ahmad@uit.no](mailto:*azeem.ahmad@uit.no) and [roy.dalmo@uit.no](mailto:roy.dalmo@uit.no)

**Supplementary-I**

Changes over time in the height of 10 frames from a representative movie, including one frame captured immediately after a snapping event. (a1 – j1) Reconstructed phase map images, with a yellow box highlighting the specific ROI measured. (a2 – j2) show the measured area (yellow box) within the specific ROI, with measurements taken across 100 pixels perpendicular to the length to determine the GH. (a3 – j3) Line profiles measured from the ROIs illustrate the depletion in height over the 10 frames.

**Supplementary-II**

Videos V1 – V6 represent different phase movies of fish cells with their TNTs.
